# Supplementary material for: Development and Validation of an Automated Image-Based Deep Learning Platform for Sarcopenia Assessment in Head and Neck Cancer
Source: PubMed Central journal article supplement (PMC10415962; doi:10.1001/jamanetworkopen.2023.28280), 2023-08-10
Supplement: jamanetwopen-e2328280-s002.pdf [file jamanetwopen-e2328280-s002.pdf]

## Data Sharing Statement

Ye. Development and Validation of an Automated Image-Based Deep Learning Platform for Sarcopenia Assessment in Head and Neck Cancer. *JAMA Netw Open*. Published August 10, 2023. doi:10.1001/jamanetworkopen.2023.28280

### Data

**Data available:** Yes

**Data types:** Deidentified participant data

**How to access data:** [Benjamin\\_Kann@DFCI.HARVARD.EDU](mailto:Benjamin_Kann@DFCI.HARVARD.EDU)

**When available:** With publication

### Supporting Documents

**Document types:** Statistical/analytic code

**How to access documents:** <https://github.com/xmuyzz/C3-Segmentation>

**When available:** With publication

### Additional Information

**Who can access the data:** anyone requesting the data

**Types of analyses:** for a specified purpose

**Mechanisms of data availability:** with investigator support
